# Supplementary material for: Renal Medulla is More Sensitive to Cisplatin than Cortex Revealed by Untargeted Mass Spectrometry-Based Metabolomics in Rats
Source: PubMed Central journal article supplement (PMC5353697; doi:10.1038/srep44804), 2017-03-16
Supplement: srep44804-s1.pdf [file srep44804-s1.pdf]

## **Supporting Information**

### Renal Medulla is More Sensitive to Cisplatin than Cortex Revealed by Untargeted Mass Spectrometry-Based Metabolomics in Rats

Pei Zhang<sup>1,2,3</sup>, Jia-Qing Chen<sup>1,2,3</sup>, Wan-Qiu Huang<sup>1,2,3</sup>, Wei Li<sup>1,2,3</sup>, Yin Huang<sup>1,2,3</sup>, Zun-Jian Zhang<sup>1,2,3\*</sup> and Feng-Guo Xu<sup>1,2,3\*</sup>

<sup>1</sup> Key Laboratory of Drug Quality Control and Pharmacovigilance (Ministry of Education), China Pharmaceutical University, Nanjing 210009, P. R. China.

<sup>2</sup> Jiangsu Key Laboratory of Drug Screening, China Pharmaceutical University, Nanjing 210009, P. R. China.

<sup>3</sup> State Key Laboratory of Natural Medicine, China Pharmaceutical University, Nanjing 210009, P. R. China.

**\* Corresponding author:**

Feng-Guo Xu,

Key Laboratory of Drug Quality Control and Pharmacovigilance (China Pharmaceutical University),  
Ministry of Education, Tongjiaxiang No. 24, Nanjing 210009, China;

Tel/Fax: +86 025 83271021; E-mail: fengguoxu@gmail.com

Zun-Jian Zhang,

Key Laboratory of Drug Quality Control and Pharmacovigilance (China Pharmaceutical University),  
Ministry of Education, Tongjiaxiang No. 24, Nanjing 210009, China;

Tel/Fax: +86 025 83271454; E-mail: zunjianzhangcpu@hotmail.com

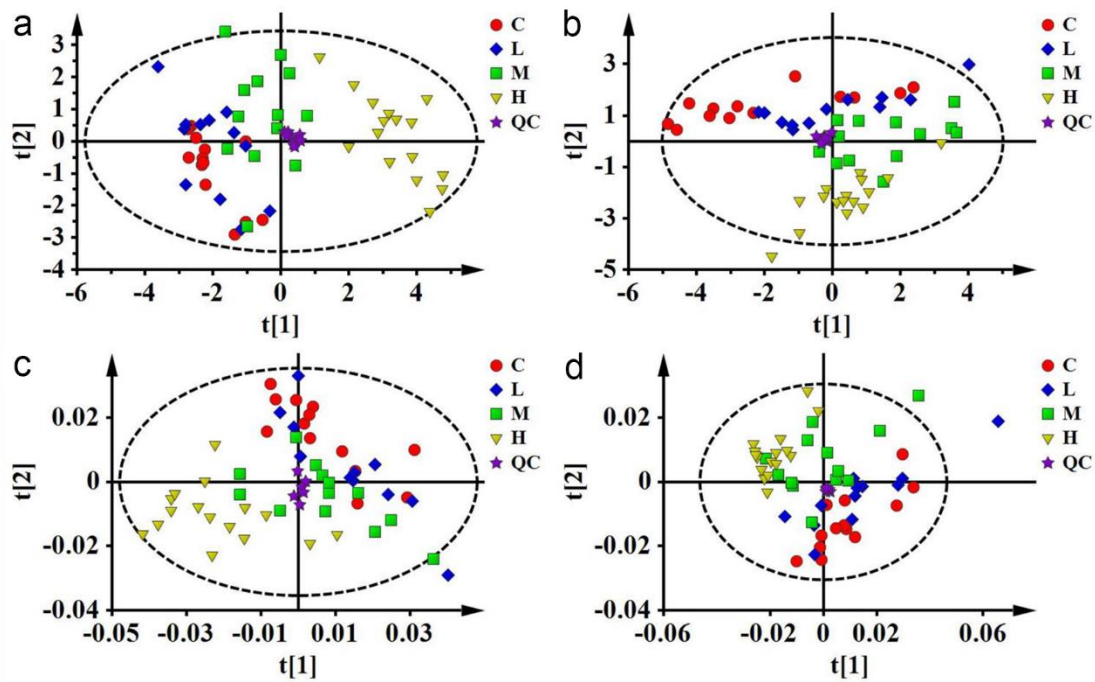

**Figure S1.** Data quality evaluation for untargeted metabolomics using PCA. PCA score plot of (a) QCs and cortex samples based on GC-MS data, model parameter:  $R^2X=0.48$ ,  $Q^2=0.366$ ; (b) QCs and medulla samples based on GC-MS data, model parameter:  $R^2X=0.671$ ,  $Q^2=0.568$ ; (c) QCs and cortex samples based on LC-MS data, model parameter:  $R^2X=0.593$ ,  $Q^2=0.307$ , and (d) QCs and medulla samples based on LC-MS data, model parameter:  $R^2X=0.629$ ,  $Q^2=0.297$ .

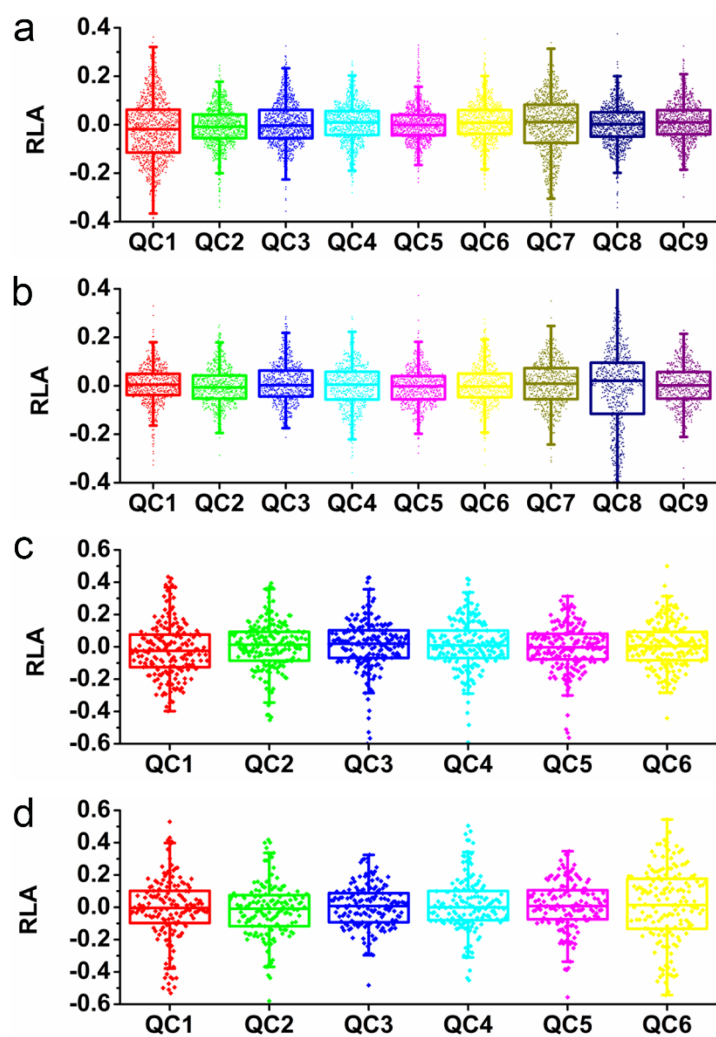

**Figure S2.** Data quality evaluation for untargeted metabolomics using RLA plot. RLA plot of (a) QCs of cortex in GC-MS analysis; (b) QCs of medulla in GC-MS analysis; (c) QCs of cortex in LC-MS analysis, and (d) QCs of medulla in LC-MS analysis.

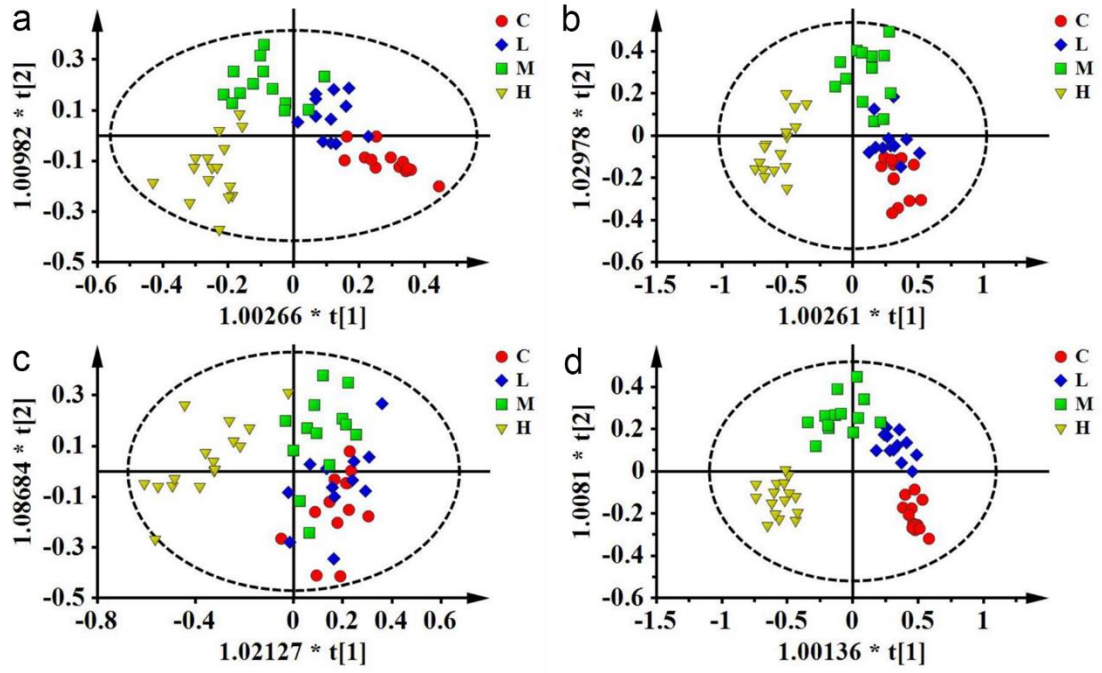

**Figure S3.** OPLS-DA score plots of (A) cortex samples based on GC-MS data; (B) cortex samples based on LC-MS data; (C) medulla samples based on GC-MS data and (D) medulla samples based on LC-MS data.

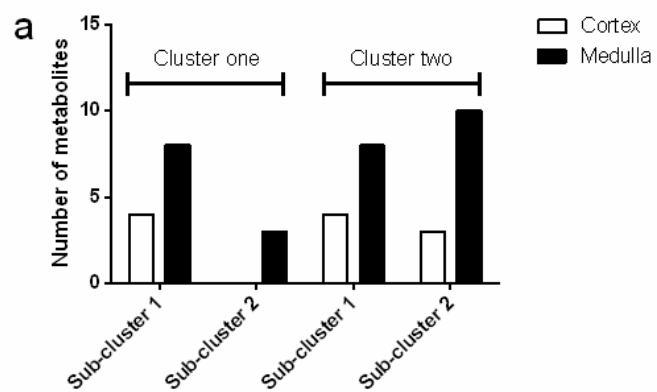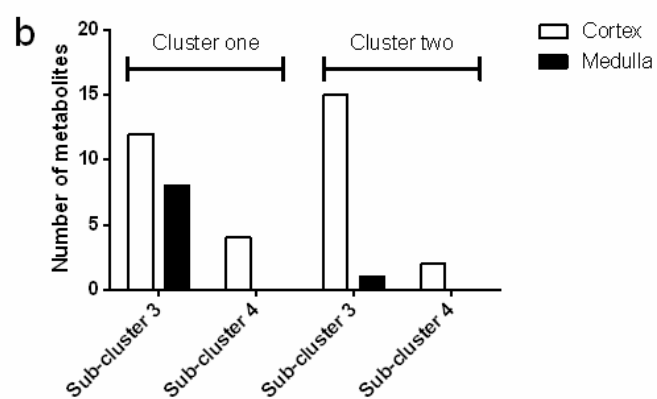

**Figure S4** Histogram of the number of metabolites. (a) Metabolites in sub-cluster 1 and 2 within cluster one and two; (b) Metabolites in sub-cluster 3 and 4 within cluster one and two.

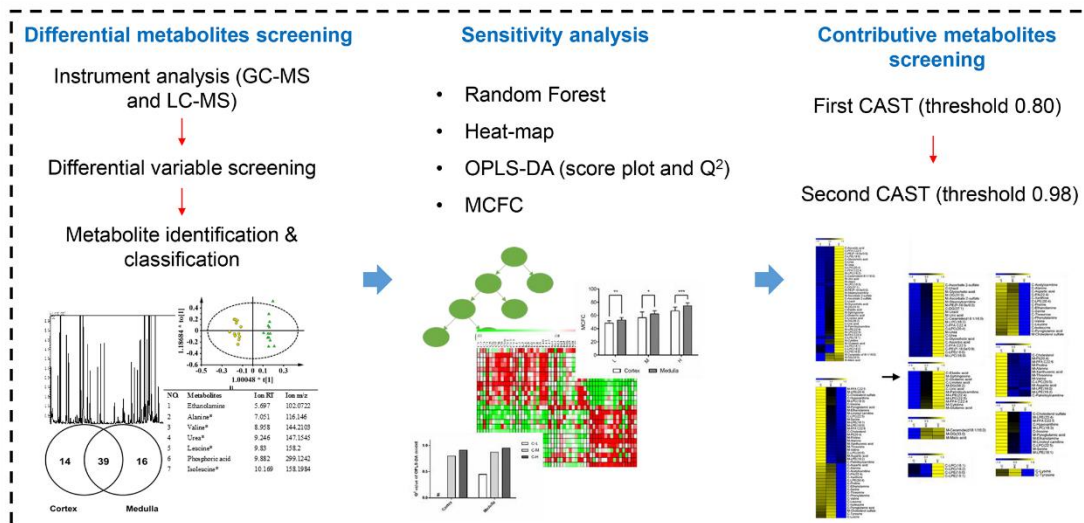

**Figure S5.** Strategy for differential metabolites screening, sensitivity analysis and contributory metabolites screening.
